# Supplementary material for: Effect of introducing a cyclobutylmethyl group into an onium cation on the thermodynamic properties of ionic clathrate hydrates
Source: Royal Society of Chemistry journal article supplement (doi:10.1039/d2nj04361k), 2022-11-11
Supplement: d2nj04361k1.pdf [file d2nj04361k1.pdf]

## Supplementary Information

### Effect of introducing a cyclobutylmethyl group to an onium cation on the thermodynamic properties of ionic clathrate hydrate

Sakura Azuma,<sup>a</sup> Jin Shimada,<sup>bcd</sup> Katsuhiko Tsunashima,<sup>\*e</sup> Takeshi Sugahara,<sup>\*bc</sup> Takayuki Hirai<sup>bc</sup>

- a. Advanced Engineering Faculty, National Institute of Technology, Wakayama Collage, 77 Noshima, Nada, Gobo, Wakayama 644-0023, Japan
- b. Division of Chemical Engineering, Department of Materials Engineering Science, Graduate School of Engineering Science, Osaka University, 1-3 Machikaneyama, Toyonaka, Osaka 560-8531, Japan
- c. Division of Energy and Photochemical Engineering, Research Center for Solar Energy Chemistry, Graduate School of Engineering Science, Osaka University, 1-3 Machikaneyama, Toyonaka, Osaka 560-8531, Japan
- d. Research Fellow of Japan Society for the Promotion of Science, 5-3-1 Kojimachi, Chiyoda-ku, Tokyo 102-0083, Japan
- e. Department of Material Science, National Institute of Technology, Wakayama Collage, 77 Noshima, Nada, Gobo, Wakayama 644-0023, Japan

## Corresponding Authors

\*(K.T.) Tel: +81-738-29-8413. Fax: +81-738-29-8413. E-mail : tsunashima@wakayama-nct.ac.jp.

\*(T.S.) Tel and Fax: +81-6-6850-6293. E-mail: sugahara@cheng.es.osaka-u.ac.jp.

### **NMR characterization of tri-*n*-butyl(cyclobutylmethyl)phosphonium bromide (P444(1c4)-Br) synthesized in the present study.**

<sup>1</sup>H NMR (400.13 MHz in CDCl<sub>3</sub>), δ 0.90–1.05 (t, 9H, P<sup>+</sup>CH<sub>2</sub>(CH<sub>2</sub>)<sub>2</sub>CH<sub>3</sub>); 1.41–1.67 (m, 12H, P<sup>+</sup>CH<sub>2</sub>(CH<sub>2</sub>)<sub>2</sub>CH<sub>3</sub>); 1.83–2.05 (m, 4H, P<sup>+</sup>CH<sub>2</sub>CH(CH)<sub>2</sub>CH<sub>2</sub>); 2.15–2.31 (m, 2H, P<sup>+</sup>CH<sub>2</sub>CH(CH)<sub>2</sub>CH<sub>2</sub>); 2.32–2.53 (m, 6H, P<sup>+</sup>CH<sub>2</sub>(CH<sub>2</sub>)<sub>2</sub>CH<sub>3</sub>); 2.55–2.75 (m, 3H, P<sup>+</sup>CH<sub>2</sub>CH(CH)<sub>2</sub>CH<sub>2</sub>).

<sup>13</sup>C NMR (100.62 MHz in CDCl<sub>3</sub>), δ 13.36 (s, P<sup>+</sup>CH<sub>2</sub>CH<sub>2</sub>CH<sub>2</sub>CH<sub>3</sub>); 18.70–19.03 (d, P<sup>+</sup>CH<sub>2</sub>CH<sub>2</sub>CH<sub>2</sub>CH<sub>3</sub>); 19.49 (s, P<sup>+</sup>CH<sub>2</sub>CH(CH)<sub>2</sub>CH<sub>2</sub>); 23.67–23.88 (m, P<sup>+</sup>CH<sub>2</sub>CH<sub>2</sub>CH<sub>2</sub>CH<sub>3</sub>); 25.60 (s, P<sup>+</sup>CH<sub>2</sub>CH<sub>2</sub>CH<sub>2</sub>CH<sub>3</sub>); 26.04 (d, P<sup>+</sup>CH<sub>2</sub>CH(CH)<sub>2</sub>CH<sub>2</sub>); 29.16–29.22 (d, P<sup>+</sup>CH<sub>2</sub>CH(CH)<sub>2</sub>CH<sub>2</sub>), 30.17–30.27 (d, P<sup>+</sup>CH<sub>2</sub>CH(CH)<sub>2</sub>CH<sub>2</sub>).

<sup>31</sup>P NMR (161.97 MHz in CDCl<sub>3</sub>), δ 32.04 (s, P<sup>+</sup>(C<sub>4</sub>H<sub>9</sub>)<sub>3</sub>(CH<sub>2</sub>CH(CH)<sub>2</sub>CH<sub>2</sub>)).

### **Raman spectra of tri-*n*-butyl(cyclobutylmethyl)phosphonium bromide (P444(1c4)-Br) salt.**

Figure S1 shows the Raman spectra of P444(1c4)-Br and P4444-Br salts. As noted in Figure 5, there are some differences derived from cyclobutylmethyl group, but no significant difference exists in the other peaks.

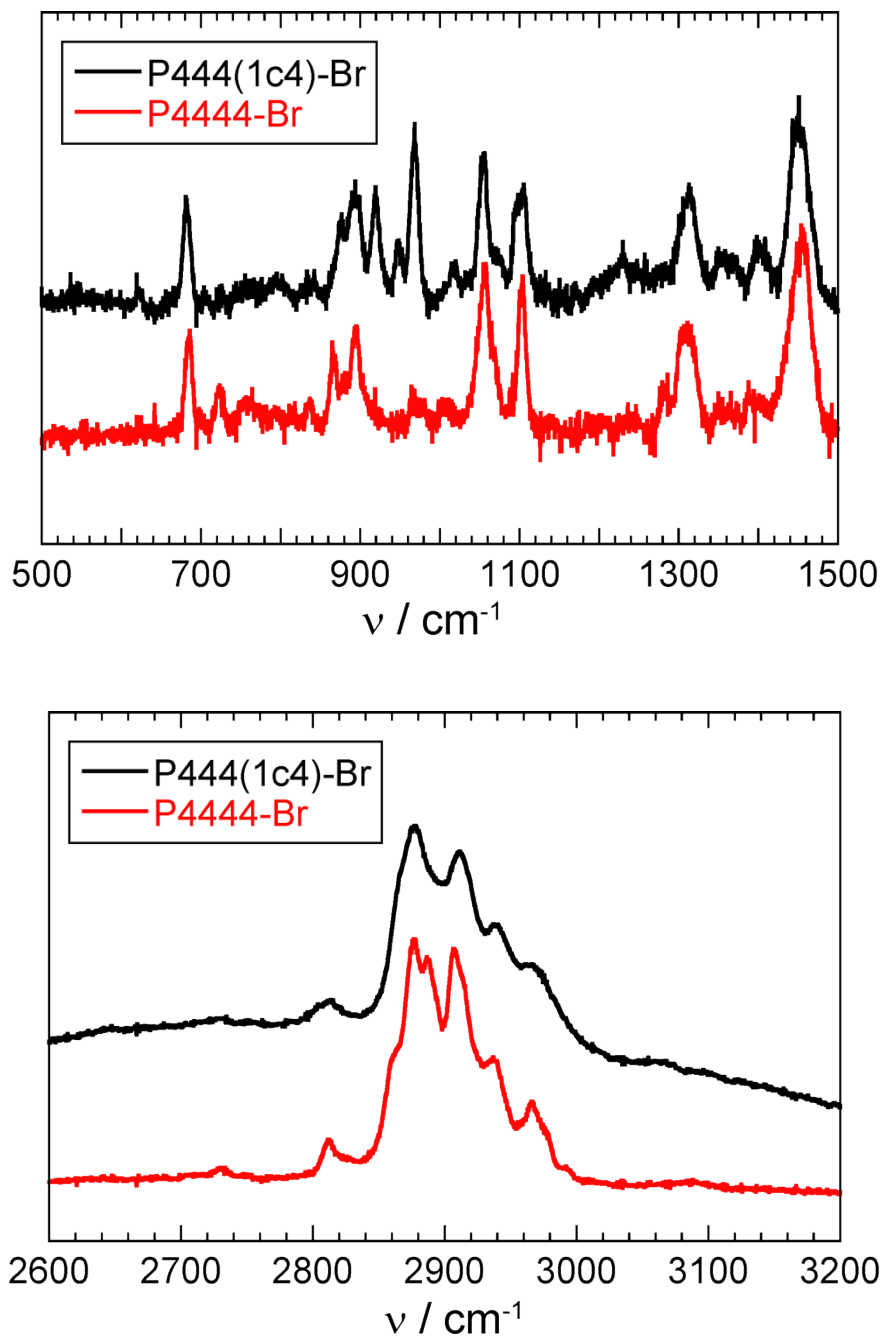

Figure S1. Raman spectra of P444(1c4)-Br and P4444-Br salts recorded at 77 K.
